# Supplementary figures and images for: Potential of Fermentation and Vacuum Packaging Followed by Chilling to Preserve Black Soldier Fly Larvae (Hermetia illucens)
Source: MDPI journal article supplement (doi:10.3390/insects12080714), 2021-08-10

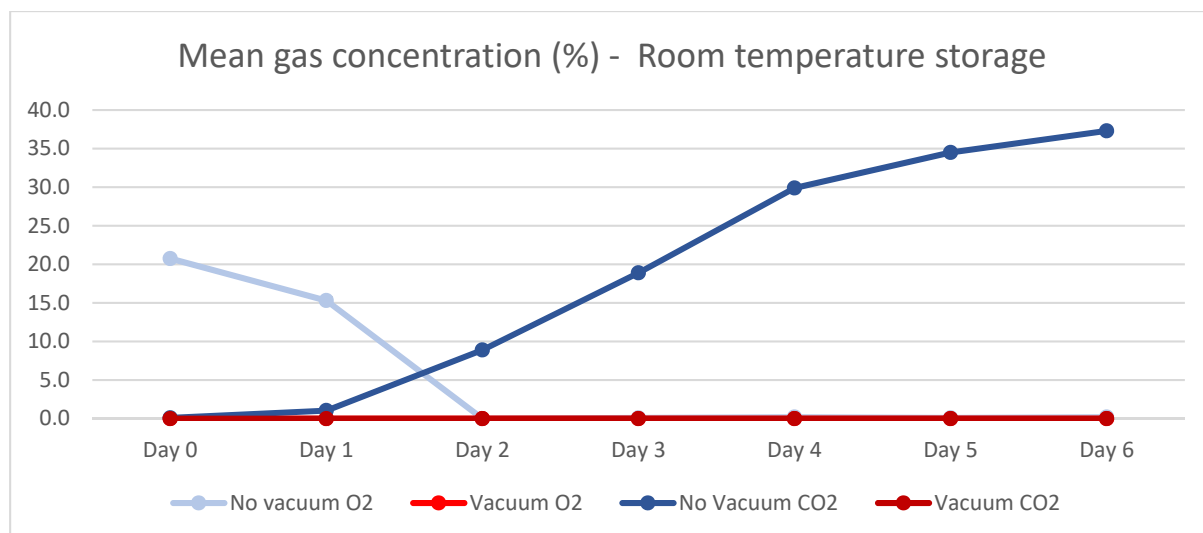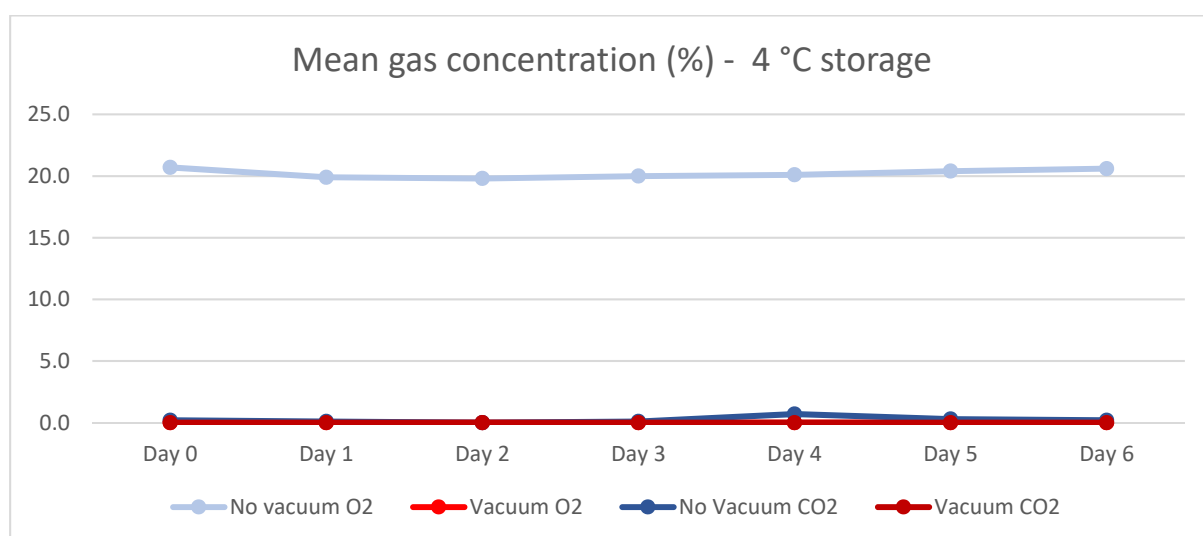

Supplement: s1 [file s1]

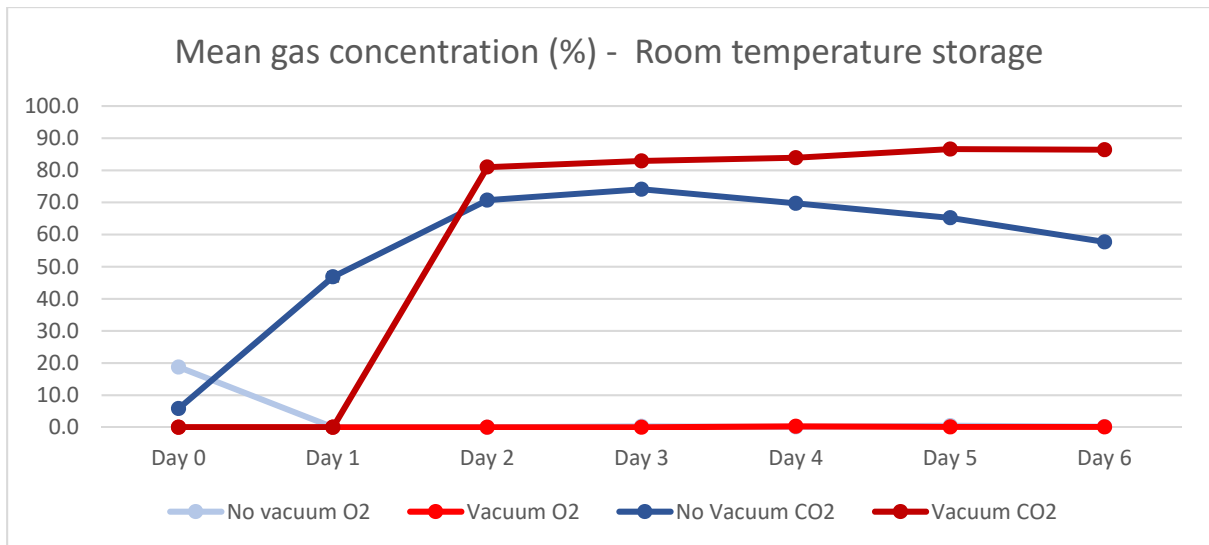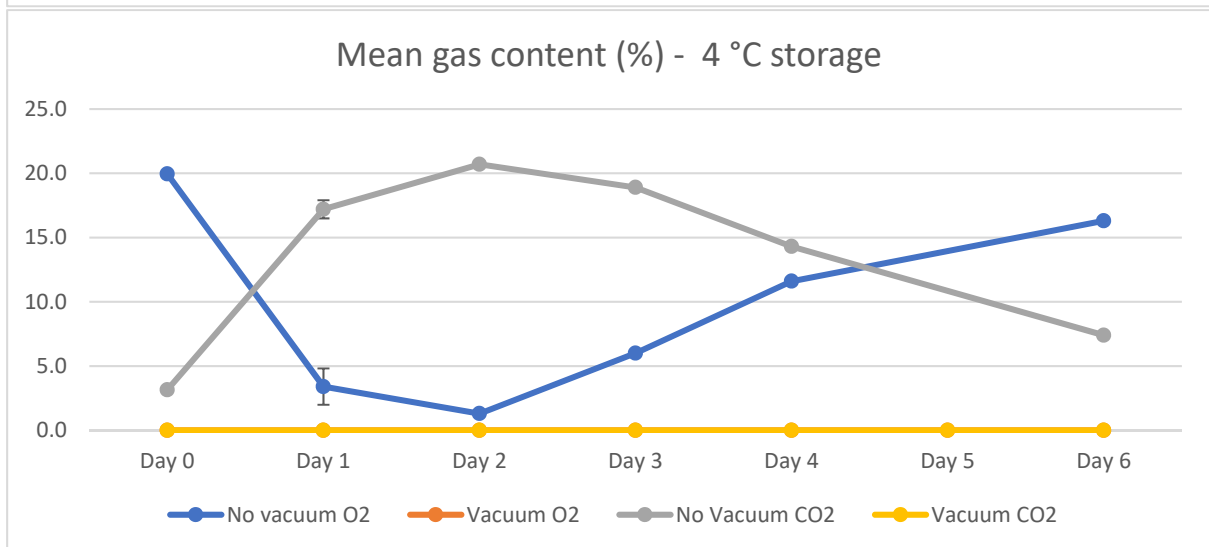

Supplement: s1 [file s1]
